# Supplementary material
Source: Springer Nature journal article supplement (https://www.springermedizin.de/resource/supplementary/12936_2012_2048_MOESM2_ESM.pdf/9543460)

Mean HAZ scores across age

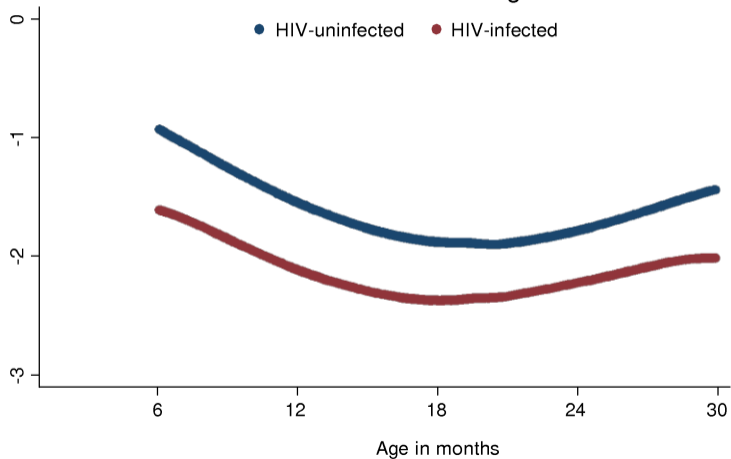

Mean WAZ scores across age

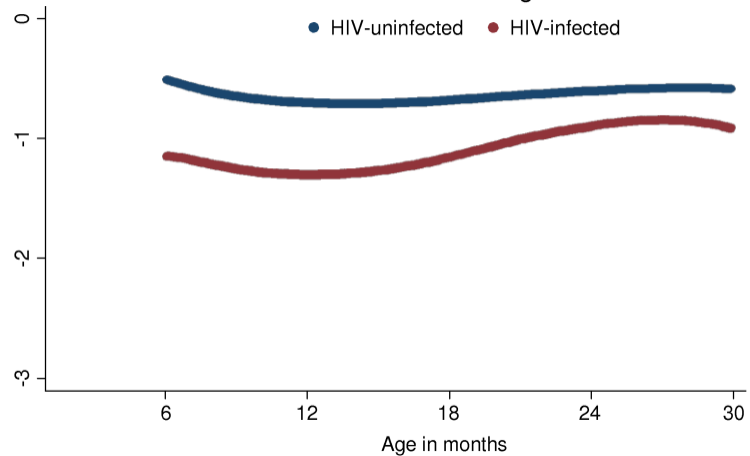

Supplement: MOESM2 [file 9543460]
